# Supplementary material
Source: publisher figshare collection journal article supplement (https://frontiersin.figshare.com/ndownloader/files/18595490)
Supplement: Supplementary file [file 18595490]

**Supplementary Figure S2.**

| Compound        | Score | MFP | RMS |
|-----------------|-------|-----|-----|
| Ant4            | 109   | 10  | 0   |
| chlorpromazine  | 55.4  | 5   | 1.2 |
| clomipramine    | 45.4  | 4   | 1.2 |
| levomepromazine | 45.4  | 4   | 1.2 |
| promazine       | 45.3  | 4   | 1.2 |

The LigandScout software was used to identify the common chemical features between Ant4 and its chemical analogues. This algorithm performs feature-based structure alignments where the similarities are calculated as the number of matched feature pairs (MFP). Columns showed the LigandScout similarity score (Score), the number of MFP obtained for each compound (MFP) and the root mean square (RMS) of their positions.
